# Supplementary material
Source: publisher figshare collection journal article supplement (https://scielo.figshare.com/articles/dataset/_/7101896)
Supplement: Supplementary file 1 [file Table_1.xls]

## Sheet: Table_1
<b>Case number</b>	<b>Gender</b>	<b>Age (years)</b>	<b>First episode of TRC</b>	<b>Duration of TRC symptoms before intravitreal injection (weeks)</b>	<b>Oral treatment before intravitreal injection</b>	<b>Number of injections</b>	<b>Initial BCVA</b>	<b>Final BCVA<a href="#TFN02">*</a></b>
1	F	58	No	4.85	Yes	1	0.20	0.00
2	F	34	No	1.85	Yes	1	0.44	0.20<a href="#TFN03">&#134;</a>
3	F	23	Yes	4.28	No	1	0.60	0.00
4	M	30	No	1.57	No	2	0.50	0.18
5	M	37	No	12.85	Yes	1	0.50	0.00
6	F	29	No	3.57	Yes	1	2.00	1.00<a href="#TFN03">&#134;</a>
7	F	18	Yes	3.57	No	1	1.20	0.18
8	M	18	No	6.42	No	1	2.00	2.00
9	F	43	No	4.28	Yes	2	1.24	0.62<a href="#TFN03">&#134;</a>
1	M	26	No	2.00	No	1	2.00	0.62<a href="#TFN03">&#134;</a>
11	F	16	No	0.85	No	1	2.00	0.20
12	M	34	No	8.57	No	2	2.00	0.00<a href="#TFN03">&#134;</a>
13	M	32	No	1.43	No	2	0.48	0.00
14	F	45	No	2.85	No	1	2.00	0.48<a href="#TFN03">&#134;</a>
15	F	64	No	2.00	No	1	0.60	0.10
16	F	37	No	2.85	No	1	1.00	0.48
