# Supplementary material
Source: publisher figshare collection journal article supplement (https://scielo.figshare.com/articles/dataset/_/7101896)
Supplement: Supplementary file 2 [file Table_2.xls]

## Sheet: Table_2
<b>BCVA (logMAR) results</b>	<b>n (%)</b>
Improved up to 2 lines	2 (12.5%)
Improved ≥3 lines	12 (75.0%)
Remained stable	2 (12.5%)
